# Supplementary material
Source: HighWire-hosted journal article supplement (https://www.annfammed.org/highwire/filestream/7970/field_highwire_adjunct_files/0/Wilkins_Supp_Figs.pdf)

Online Supplementary Material

Wilkins J, LeClair B, Smolkin M, et al. Screening colonoscopies by primary care physicians: a meta-analysis. *Ann Fam Med*. 2009;7(1):56-62.

<http://www.annfammed.org/cgi/content/full/7/1/56/DC1>

**Supplemental Figure 1. Funnel plot for adenoma detection rates.**

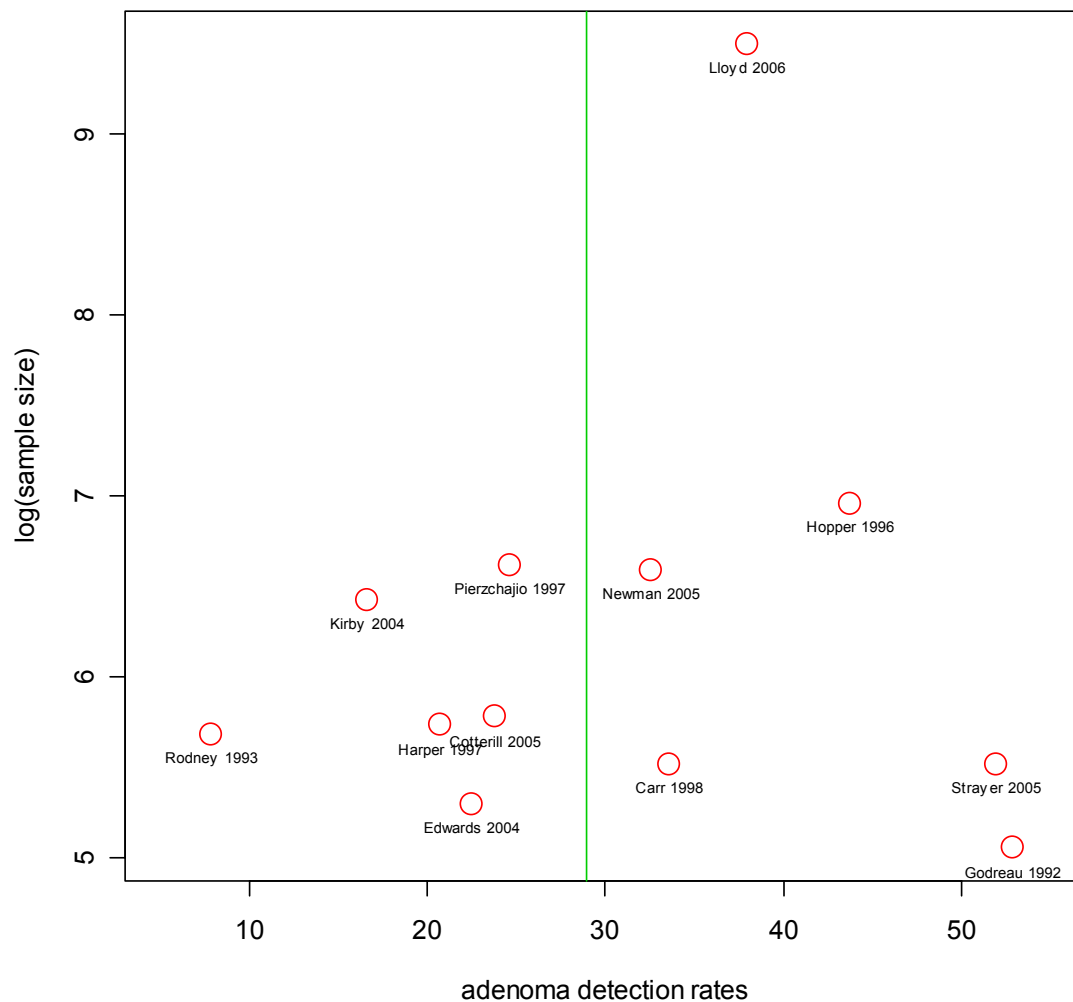

**Supplemental Figure 2. Funnel plot for adenocarcinoma detection rates.**

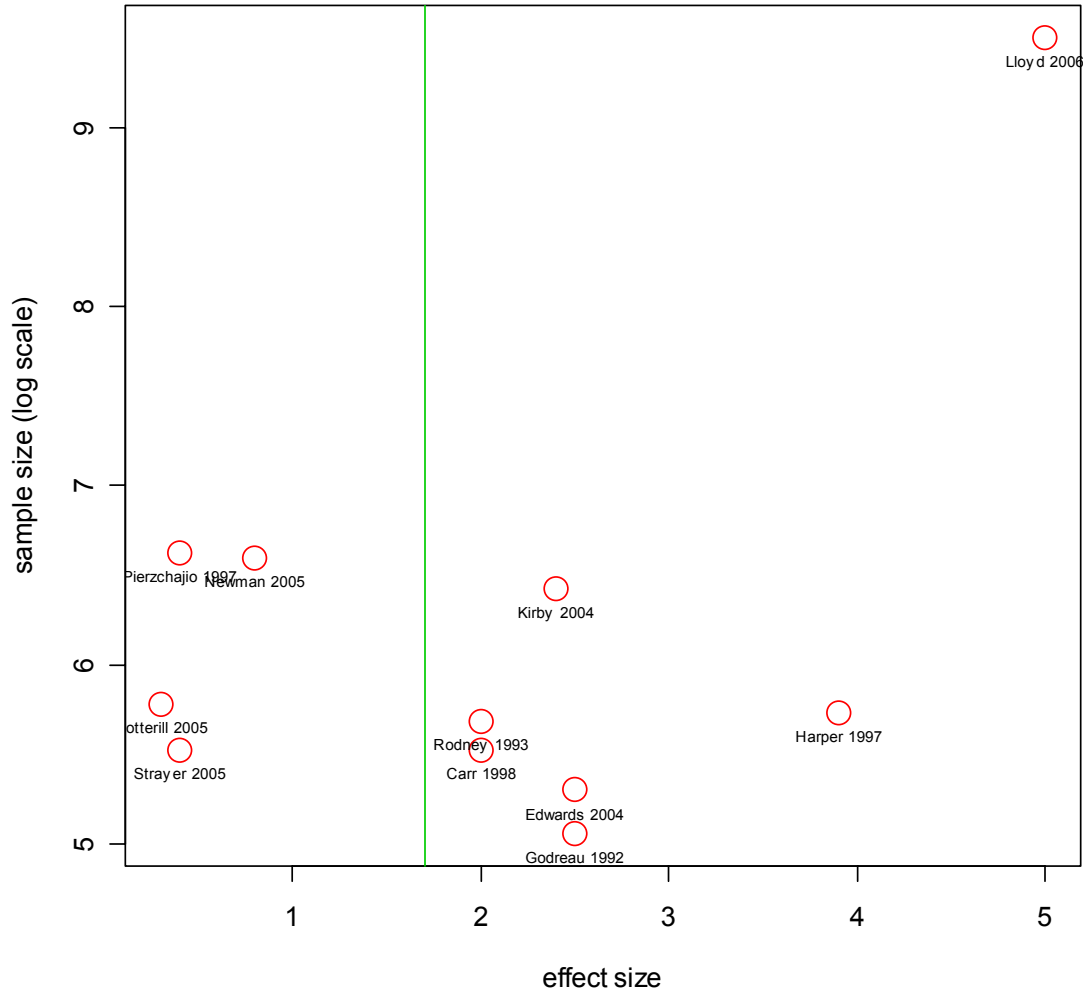

**Supplemental Figure 3. Funnel plot for reach-the-cecum rates.**

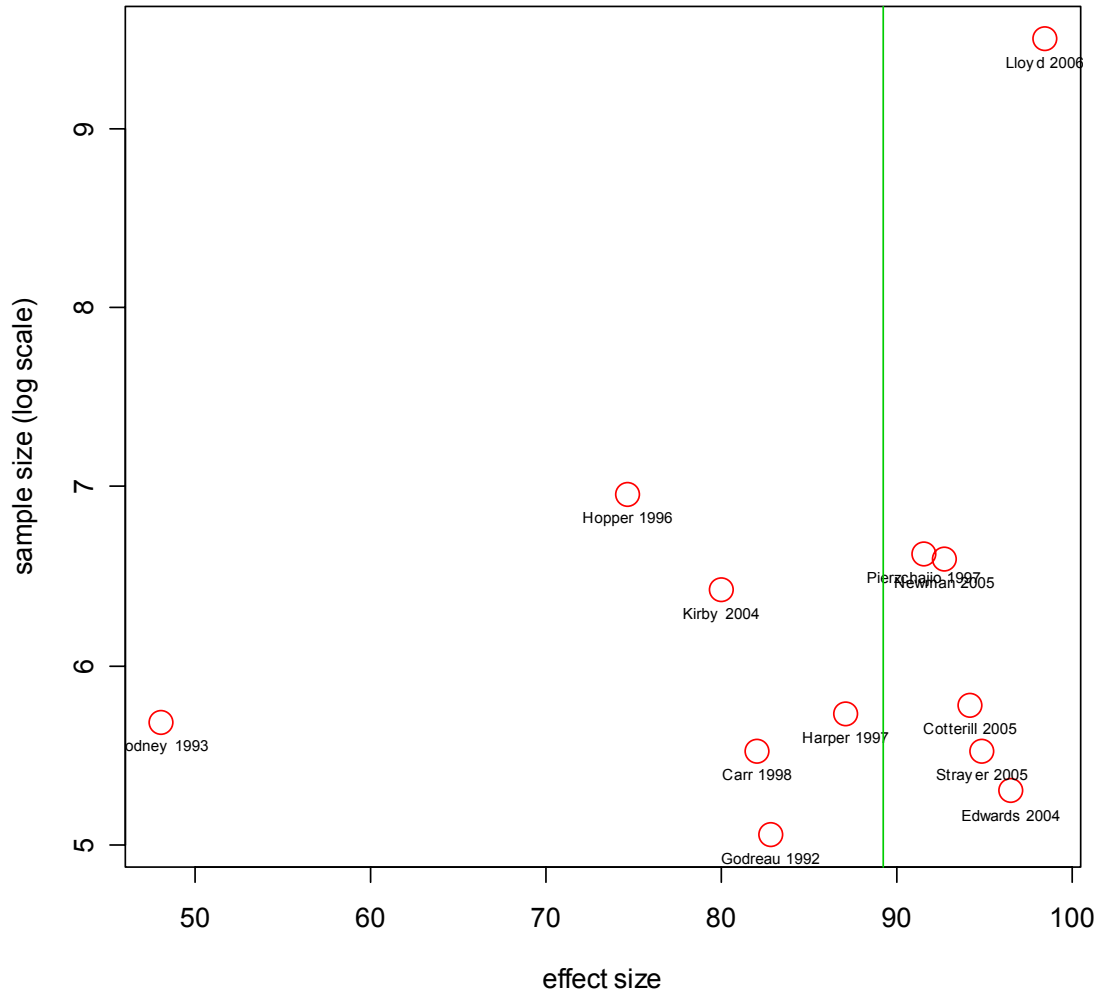

Supplement: Wilkins_Supp_Figs.pdf [file Wilkins_Supp_Figs.pdf]
